# Supplementary figures and images for: The 14-3-3 proteins of Arabidopsis regulate root growth and chloroplast development as components of the photosensory system
Source: PubMed Central journal article supplement — J Exp Bot. 2012 Feb 29;63(8):3061–70. doi: 10.1093/jxb/ers022 (PMC3350920; doi:10.1093/jxb/ers022), 2012-02-29

## Supplemental Figure 1.

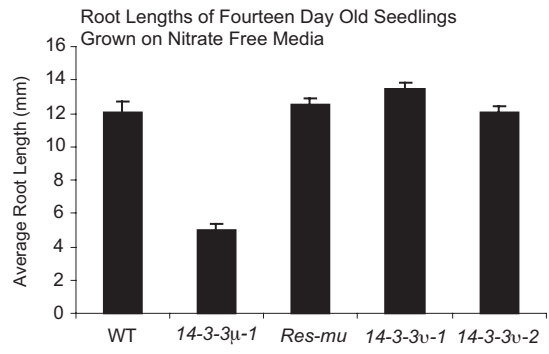

Supplement: supp_ers022_00073718-file001.pdf [file supp_ers022_00073718-file001.pdf]
